# Supplementary material for: Role of alkan-1-ol solvents in the synthesis of yellow luminescent carbon quantum dots (CQDs): van der Waals force-caused aggregation and agglomeration
Source: PubMed Central journal article supplement (PMC9051929; doi:10.1039/d0ra01349h), 2020-04-07
Supplement: RA-010-D0RA01349H-s001.pdf [file RA-010-D0RA01349H-s001.pdf]

## Electric Supporting Information

### **Role of alkan-1-ol solvents in the synthesis of yellow luminescent carbon quantum dots (CQDs): Van der Waals force-caused aggregation and agglomeration**

**Kenta Hagiwara<sup>1</sup>, Hiroshi Uchida<sup>1</sup>, Yumiko Suzuki<sup>1</sup>, Takashi Hayashita<sup>1</sup>, Kanjiro Torigoe<sup>2</sup>, Tetsuya Kida<sup>3</sup>, Satoshi Horikoshi<sup>1\*</sup>**

<sup>1</sup> *Department of Materials and Life Sciences, Faculty of Science and Technology, Sophia University, 7-1 Kioicho, Chiyodaku, Tokyo 102-8554, Japan*

<sup>2</sup> *Department of Pure and Applied Chemistry, Faculty of Science and Technology, Tokyo University of Science, 2641 Yamazaki, Noda, Chiba 278-8510, Japan*

<sup>3</sup> *Division of Materials Science, Faculty of Advanced Science and Technology, Kumamoto University, Kumamoto 860-8555, Japan*

\* Corresponding author: Satoshi Horikoshi; E-mail: horikosi@sophia.ac.jp; Fax: (+81)-3-3238-3361; Tel: (+81)-3-3238-3548

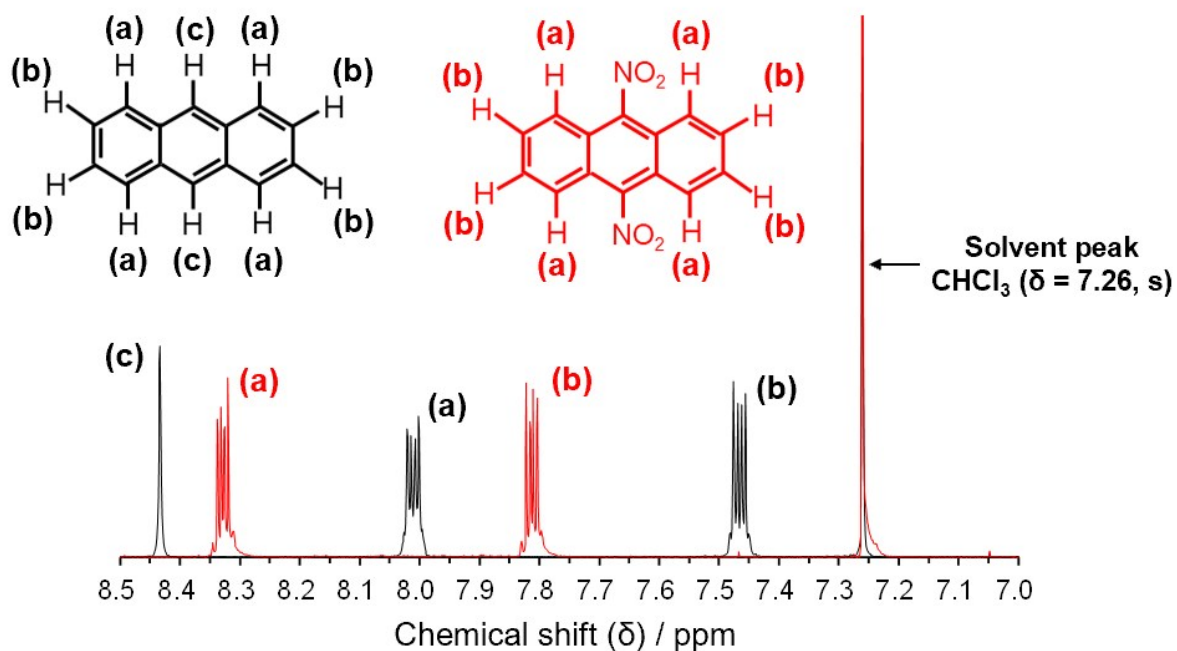

**Figure S.1** <sup>1</sup>H NMR spectra of Anthracene (black) and 9,10-Dinitroanthracene (red). <sup>1</sup>H NMR (500 MHz, CDCl<sub>3</sub>): 8.31-8.35 (m, 4H), 7.79-7.83 (m, 4H). It should be noted that utilized D-solvent, CDCl<sub>3</sub>, includes 0.05 % (v/v) of TMS as an impurity, hence, the TMS peak at 0.00 ppm was also observed. It should be also noted that a solvent peak at 7.26 ppm was determined by previous research [H. E. Gottlieb, V. Kotlyar and A. Nudelman, *J. Org. Chem.*, 1997, **62**, 7512–7515].

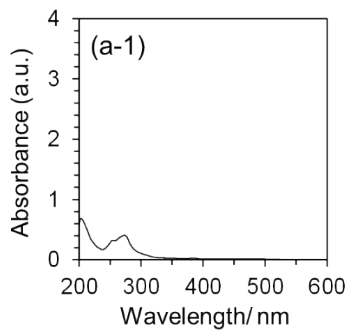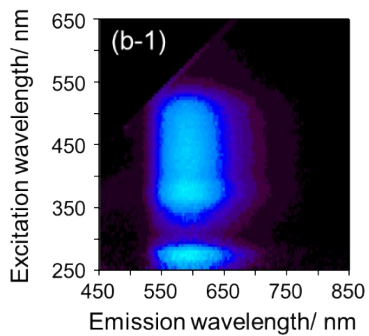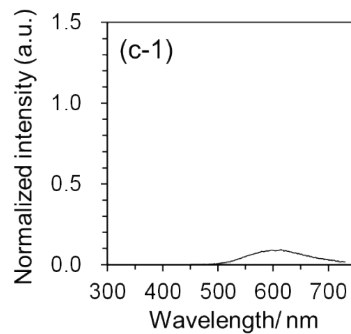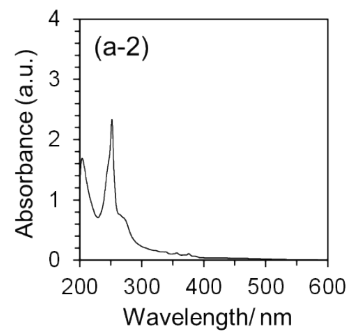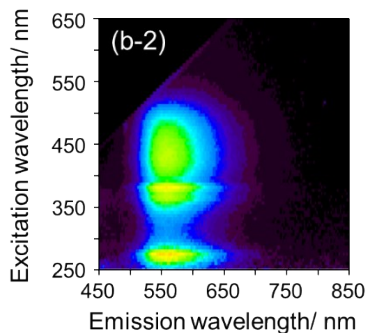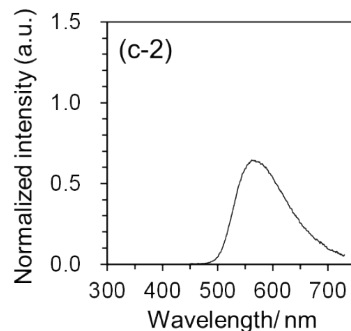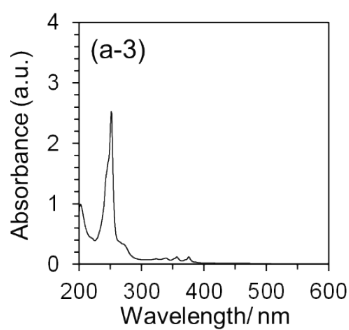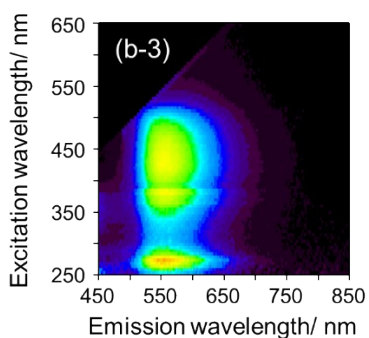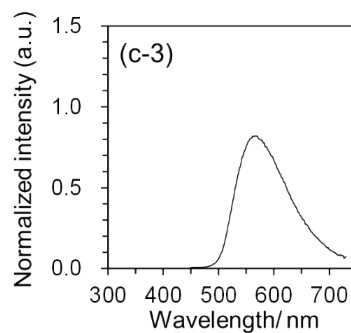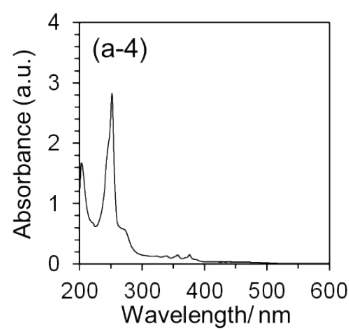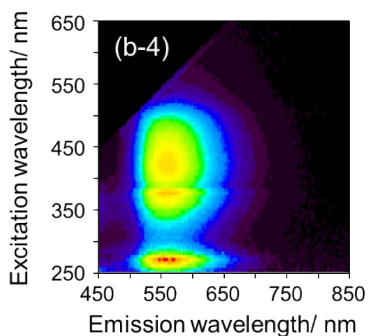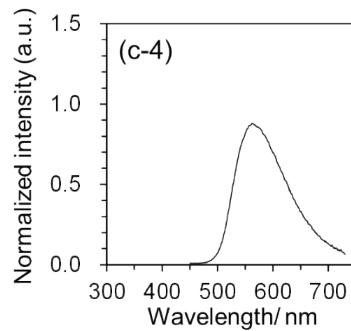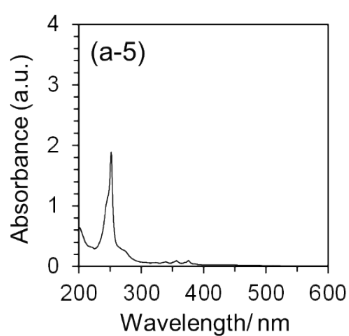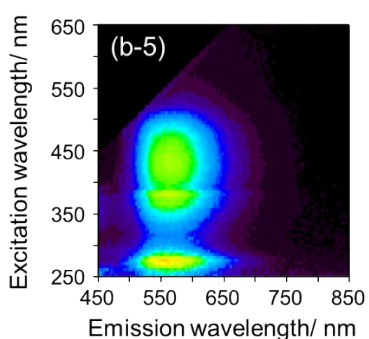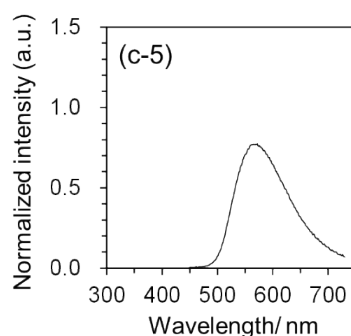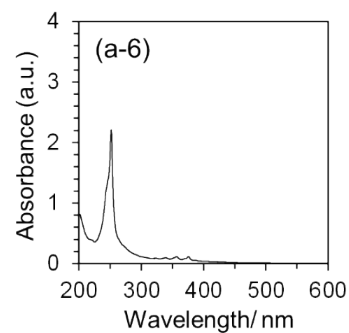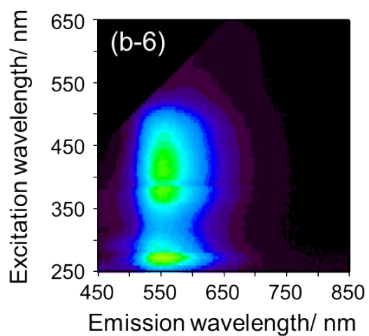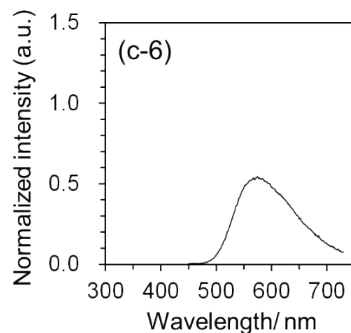

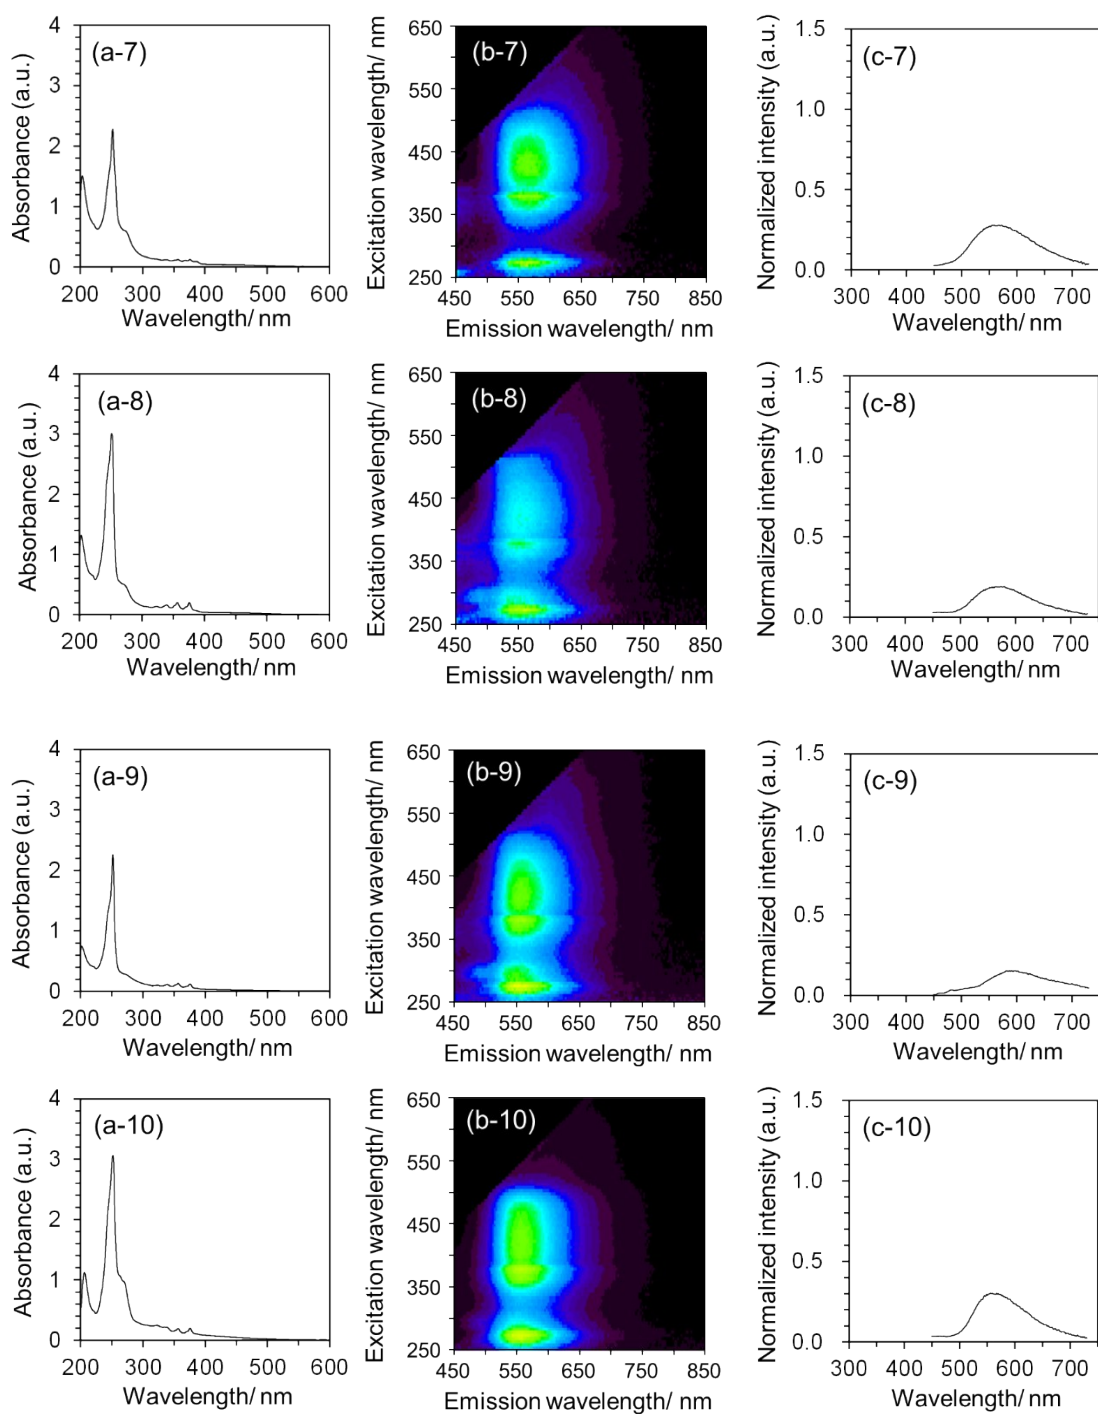

**Figure S.2** (a) UV-Vis spectra, (b) 2D excitation-emission spectra and (c) PL spectra of CQDs synthesized with and dispersed in alkan-1-ol solvents (C<sub>n</sub>H<sub>2n+1</sub>OH; n = 1~10); (1) methanol, (2) ethanol, (3) 1-propanol, (4) 1-butanol, (5) 1-pentanol, (6) 1-hexanol, (7) 1-heptanol, (8) 1-octanol, (9) 1-nonanol, (10) 1-decanol.

**Table S.1** Relationships between a number of carbon atoms in solvents (water or alkan-1-ol solvents ( $C_nH_{2n+1}OH$ :  $n = 1\sim 10$ )) with the quantum yields (QYs) of CQDs.

| Name       | Chemical structure | A number of carbon atoms (n) | QYs / % @ 275 nm |
|------------|--------------------|------------------------------|------------------|
| water      | $H_2O$             | 0                            | 0.16             |
| methanol   | $C_1H_3O$          | 1                            | 5.63             |
| ethanol    | $C_2H_6O$          | 2                            | 36.30            |
| 1-propanol | $C_3H_8O$          | 3                            | 42.22            |
| 1-butanol  | $C_4H_{10}O$       | 4                            | 48.03            |
| 1-pentanol | $C_5H_{12}O$       | 5                            | 44.46            |
| 1-hexanol  | $C_6H_{14}O$       | 6                            | 33.15            |
| 1-heptanol | $C_7H_{16}O$       | 7                            | 18.66            |
| 1-octanol  | $C_8H_{18}O$       | 8                            | 11.73            |
| 1-nonanol  | $C_9H_{20}O$       | 9                            | 12.59            |
| 1-decanol  | $C_{10}H_{22}O$    | 10                           | 13.25            |

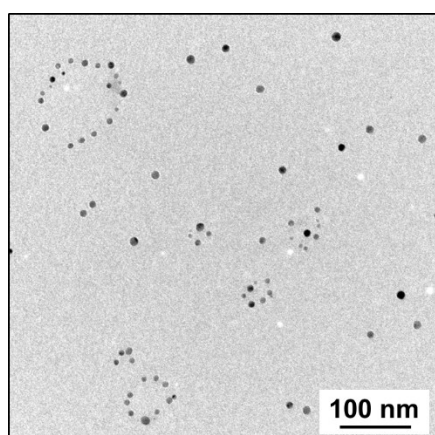

**Figure S.3** TEM image of carbon products synthesized with methanol ( $n = 1$ ).

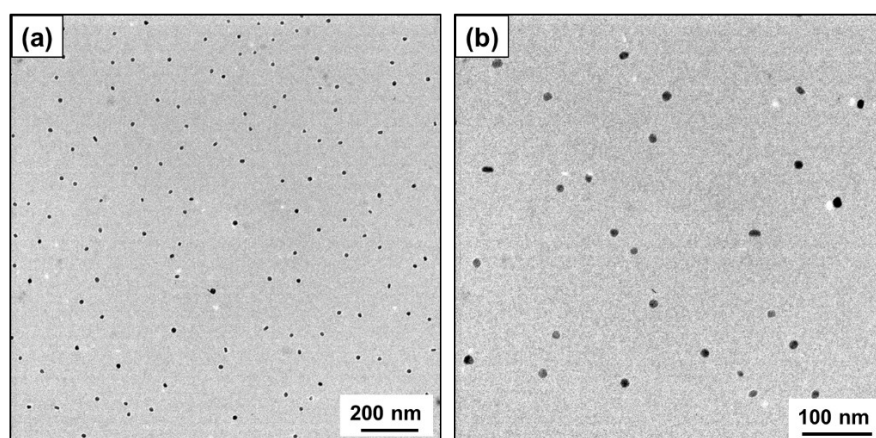

**Figure S.4** TEM image of carbon products synthesized with ethanol ( $n = 2$ ), with a scale bar (a) 200 nm and (b) 100 nm.

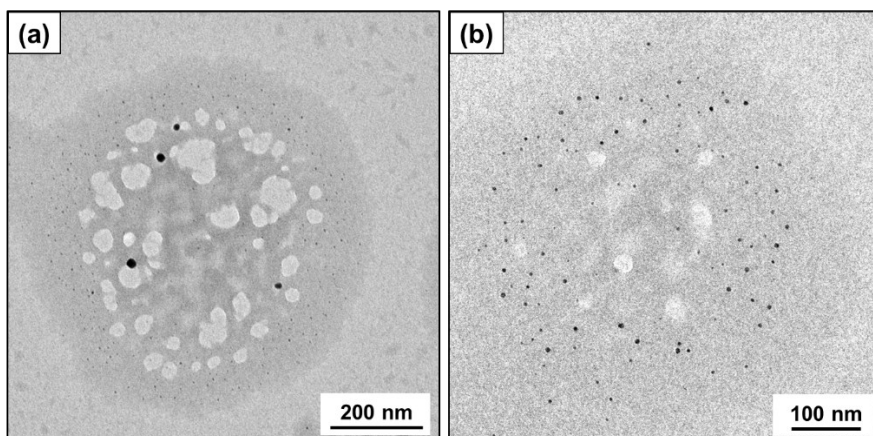

**Figure S.5** TEM image of carbon products synthesized with 1-pentanol ( $n = 5$ ), with a scale bar (a) 200 nm and (b) 100 nm.

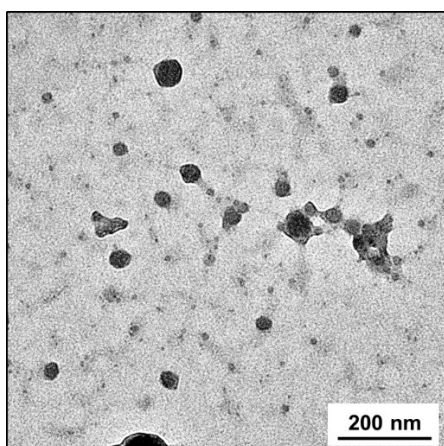

**Figure S.6** TEM image of carbon products synthesized with 1-hexanol ( $n = 6$ ).

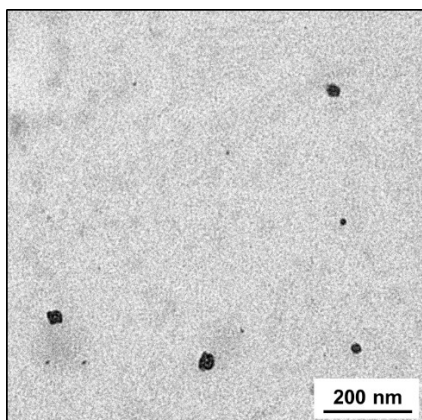

**Figure S.7** TEM image of carbon products synthesized with 1-heptanol ( $n = 7$ ).

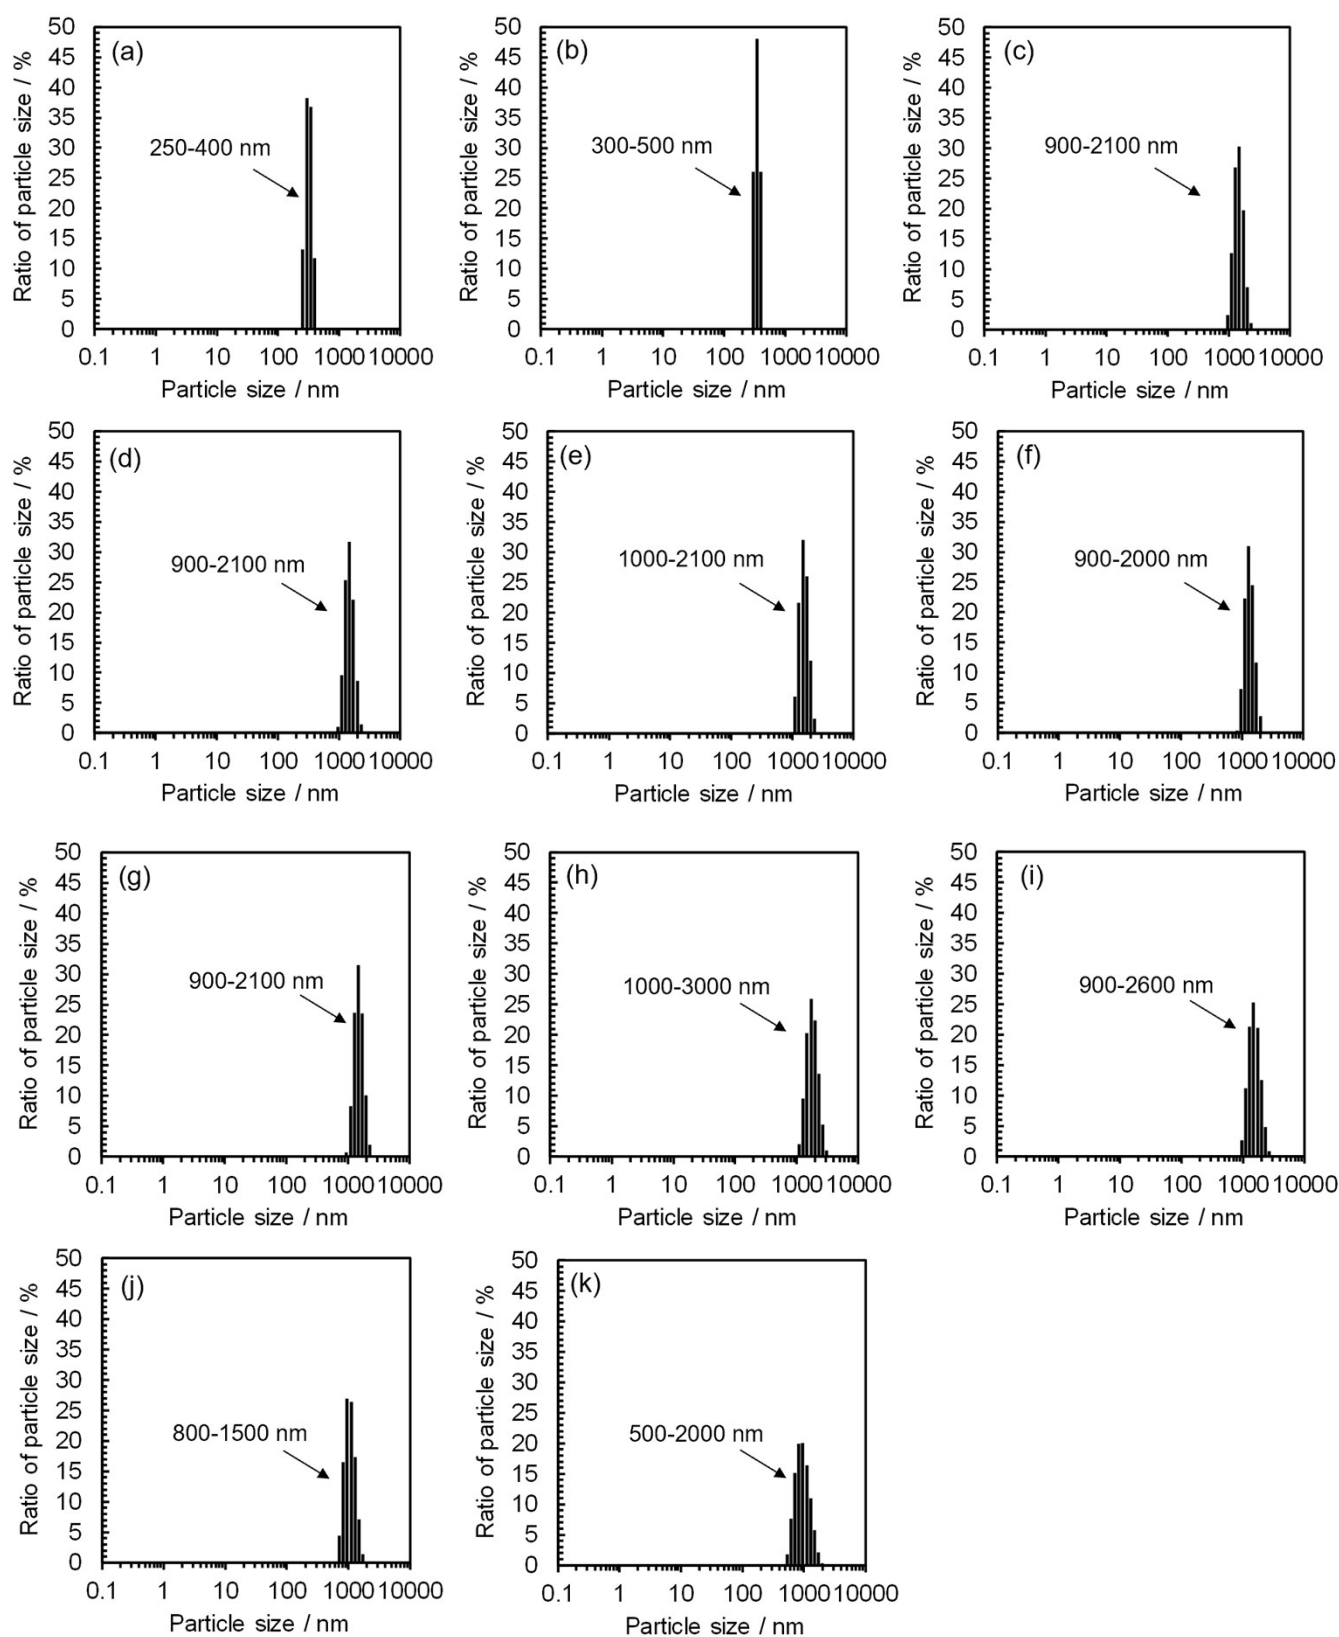

**Figure S.8** DLS spectra for mixtures of 9,10-dinitroanthracene and a solvent (water or alkan-1-ol solvents ( $C_nH_{2n+1}OH$ :  $n = 1-10$ )) prior to synthesis; (a) water, (b) methanol, (c) ethanol, (d) 1-propanol, (e) 1-butanol, (f) 1-pentanol, (g) 1-hexanol, (h) 1-heptanol, (i) 1-octanol, (j) 1-nonanol, (k) 1-decanol.

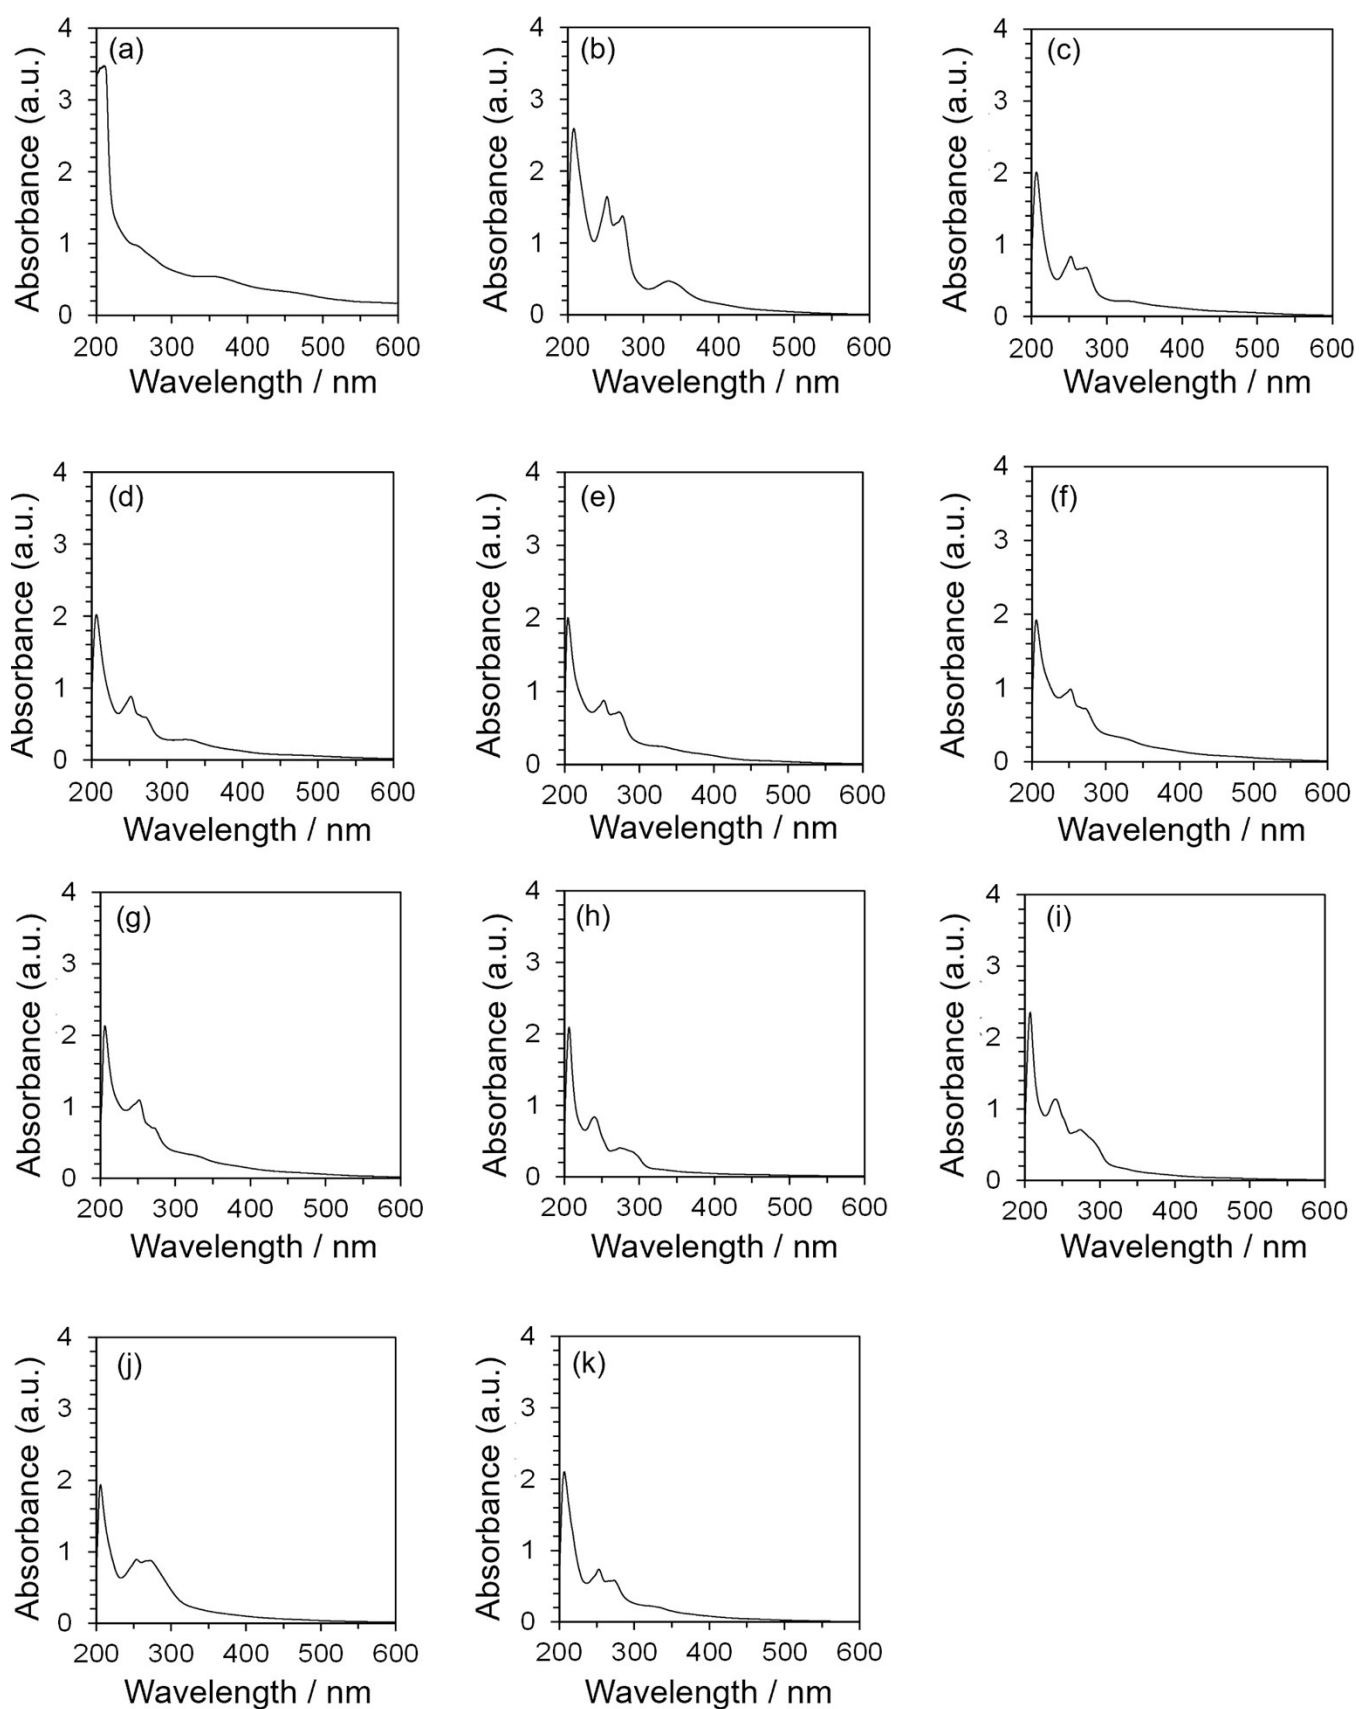

**Figure S.9** UV-Vis spectra for mixtures of 9,10-dinitroanthracene, NaOH and a solvent (water or alkan-1-ol solvents ( $C_nH_{2n+1}OH$ :  $n = 1-10$ )) prior to synthesis; (a) water, (b) methanol, (c) ethanol, (d) 1-propanol, (e) 1-butanol, (f) 1-pentanol, (g) 1-hexanol, (h) 1-heptanol, (i) 1-octanol, (j) 1-nonanol, (k) 1-decanol.



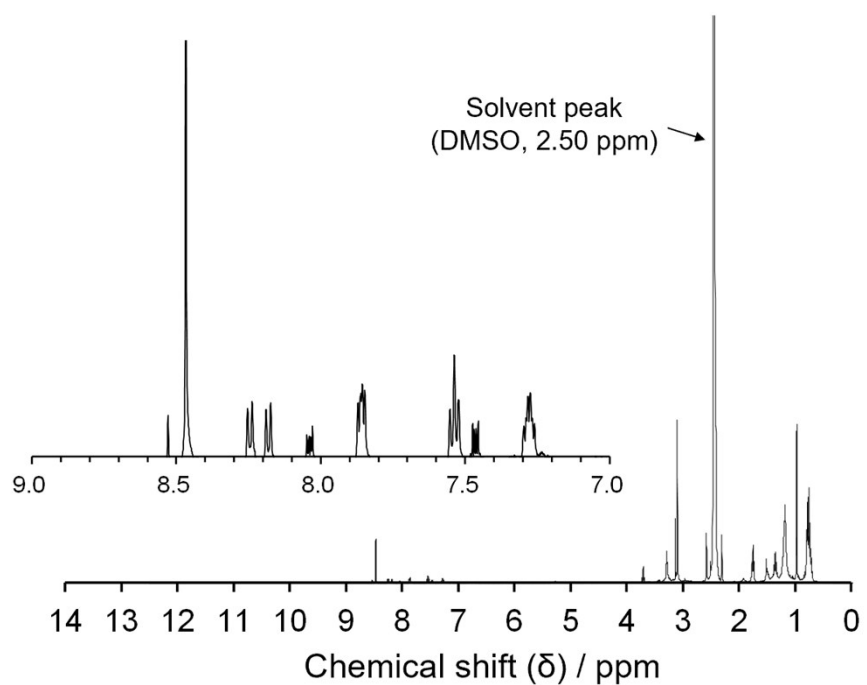

**Figure S.10** <sup>1</sup>H NMR (DMSO-*d*<sub>6</sub>) of CQDs synthesized with methanol.

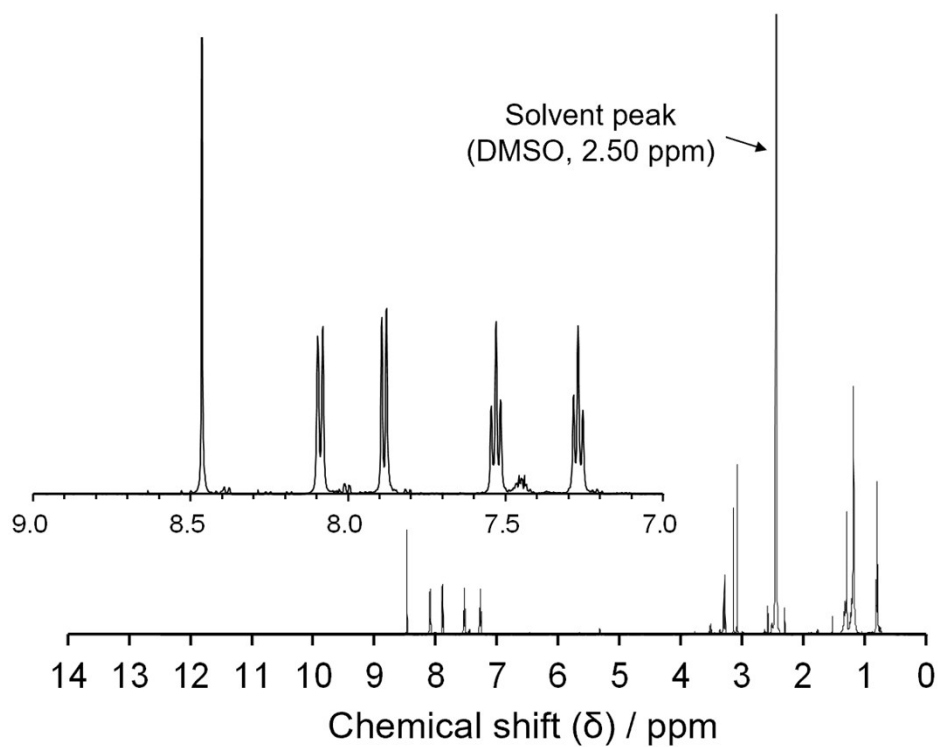

**Figure S.11** <sup>1</sup>H NMR (DMSO-*d*<sub>6</sub>) of CQDs synthesized with 1-butanol.

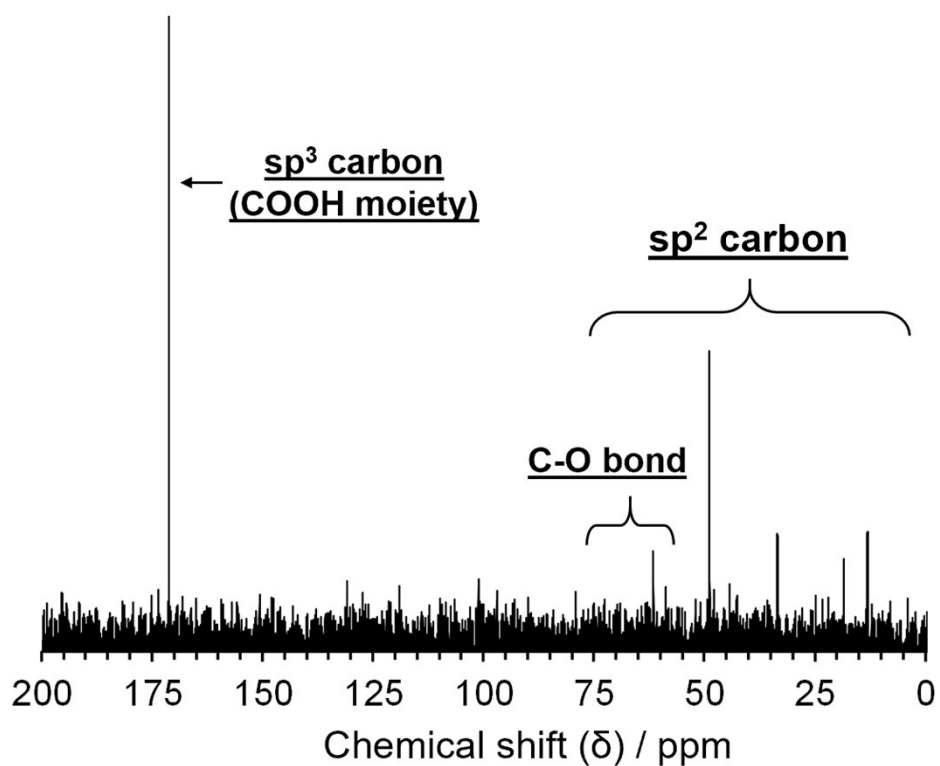

**Figure S.12** <sup>13</sup>C NMR (D<sub>2</sub>O) of CQDs synthesized with methanol.

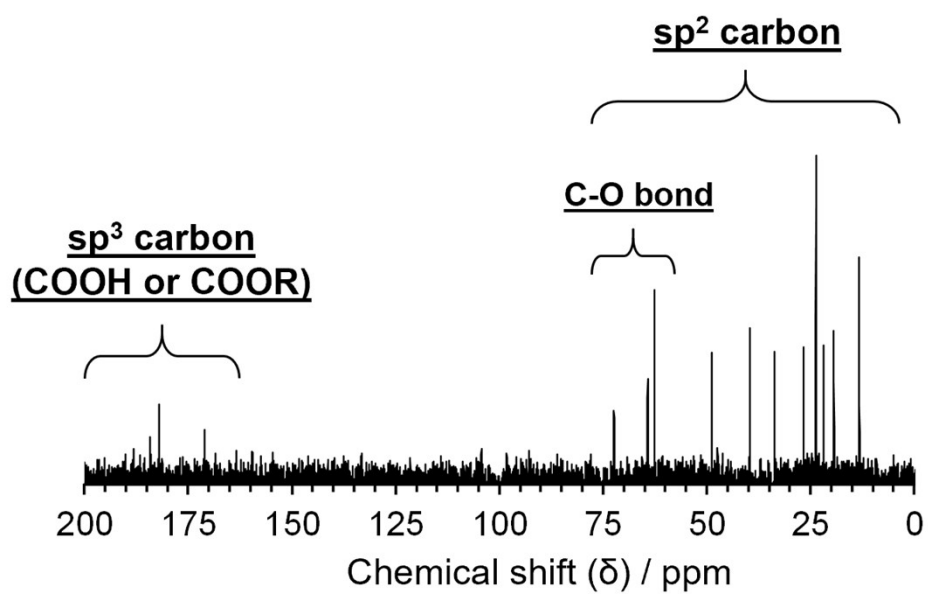

**Figure S.13** <sup>13</sup>C NMR (D<sub>2</sub>O) of CQDs synthesized with 1-butanol.

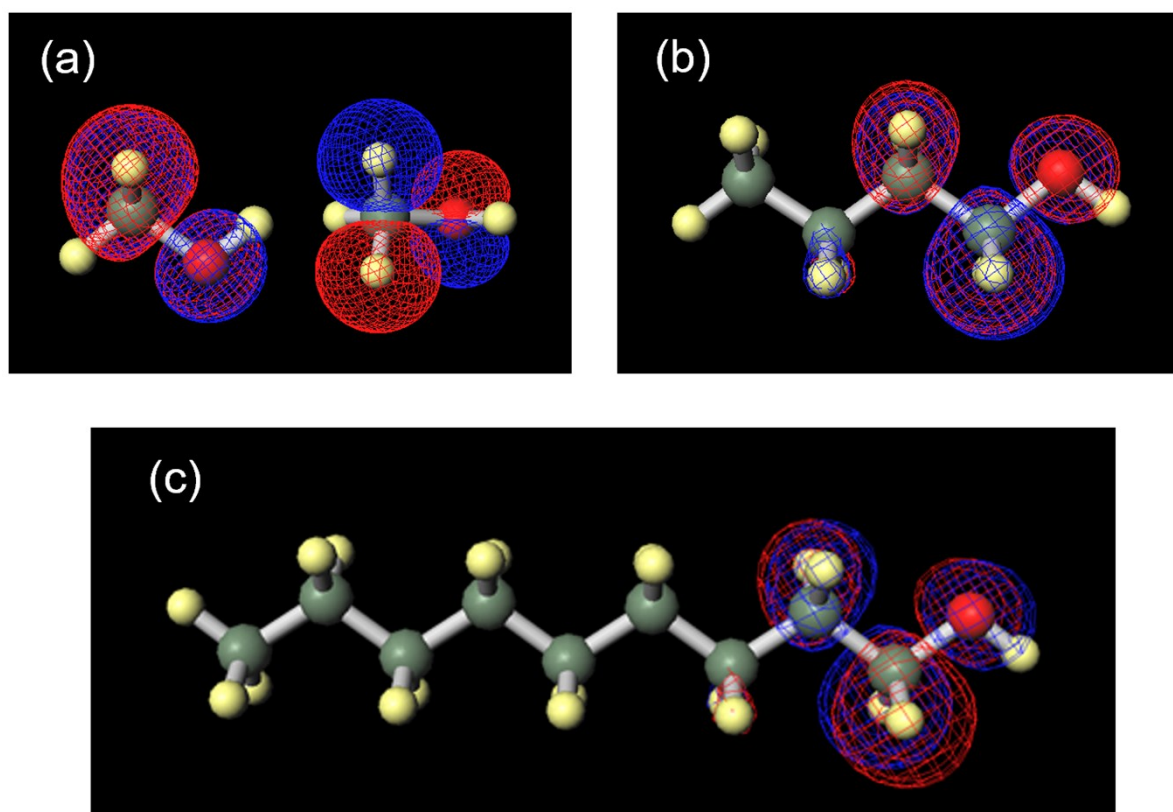

**Figure S.14** Electron density of (a) methanol ( $n = 1$ ), (b) 1-butanol ( $n = 4$ ) and (c) 1-nonanol ( $n = 9$ ) at HOMO energy state (Dark-green full sphere: C atom, yellow full sphere: H atom, and red full sphere: O atm); orbital and anti-orbitals were illustrated as blue-meshed and red-meshed clouds, respectively. Note that the other alkan-1-ol solvents showed as large electron density as depicted herein, indicating no difference in the reduction force and steric hinderance of solvents.

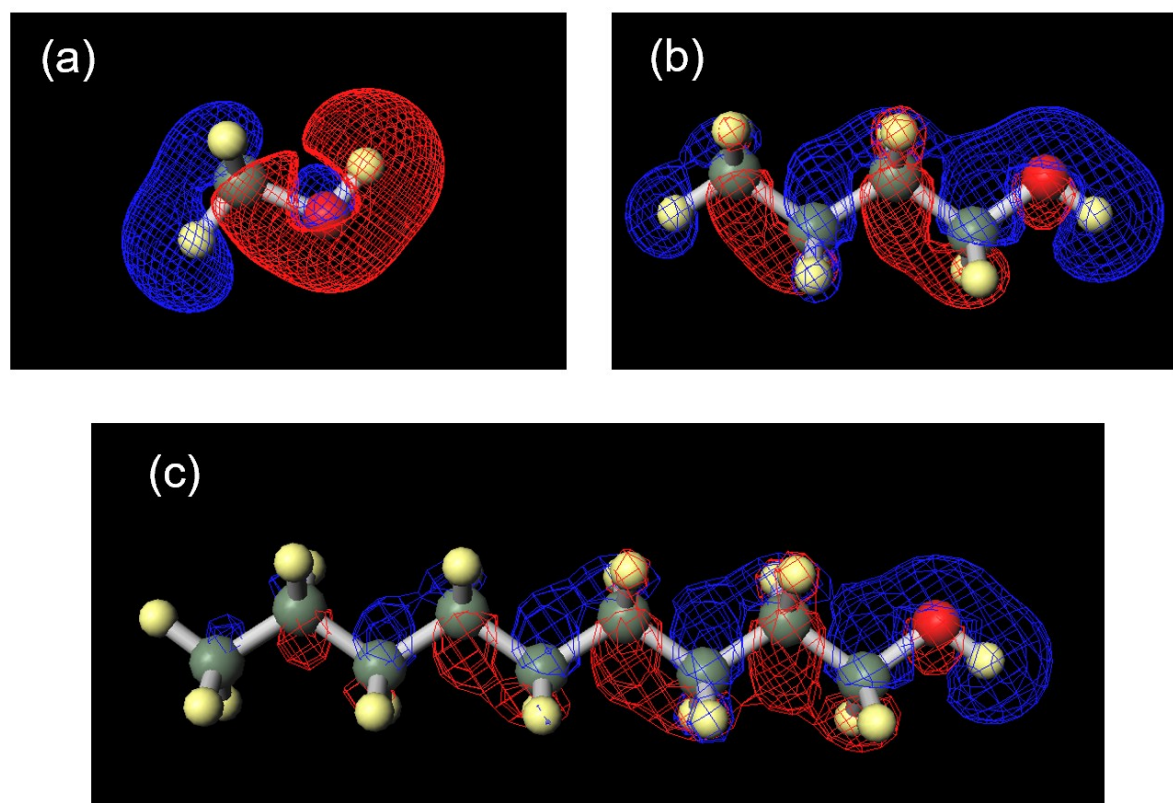

**Figure S.15** Electron density of (a) methanol ( $n = 1$ ), (b) 1-butanol ( $n = 4$ ) and (c) 1-nonanol ( $n = 9$ ) at LUMO energy state (Dark-green full sphere: C atom, yellow full sphere: H atom, and red full sphere: O atm); orbital and anti-orbitals were illustrated as blue-meshed and red-meshed clouds, respectively. Note that the other alkan-1-ol solvents showed as large electron density as depicted herein, indicating no difference in the reduction force and steric hinderance of solvents.

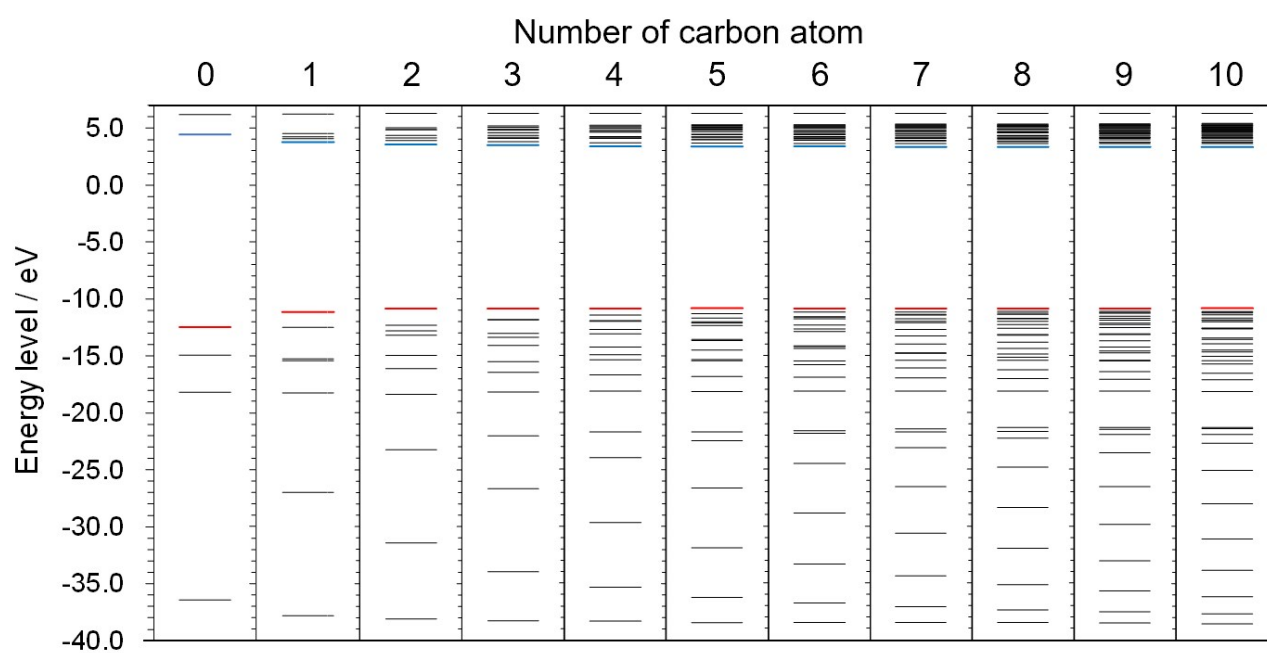

**Figure S.16** Energy states of solvents (water or alkan-1-ol,  $C_nH_{2n+1}OH$ :  $n = 1\sim 10$ ); HOMO and LUMO states are shown as red and blue lines.
